# Supplementary material
Source: MDPI journal article supplement (https://www.mdpi.com/2073-4433/12/7/908)
Supplement: s1 [file s1]

Table 1. A list of all available waterspouts and events recorded in the observed period (2008 to 2018) for NE Adriatic region. Last two columns show a presence of lighting or TSII within an influence region of 15 km. Highlighted lines reveal waterspouts related to TSII.

| Date         | Time (UTC)    | Location                | Number of waterspouts | Description of the phenomenon (yes/no) | Lightning (yes/no) | TSII (yes/no) |
|--------------|---------------|-------------------------|-----------------------|----------------------------------------|--------------------|---------------|
| 08.11.2008.  | unknown       | Rovinj                  | 1                     | no                                     | yes                | no            |
| 09.11.2008.  | unknown       | Poreč                   | 1                     | no                                     | no                 | no            |
| 01.12.2008.  | 13:45 – 13:57 | Rovinj                  | 2                     | yes                                    | yes                | yes           |
| 10.07.2009.  | 17:15 – 18:15 | Rovinj                  | 1                     | no                                     | yes                | yes           |
| 17.05.2010.  | unknown       | Funtana, Istra          | 1                     | no                                     | yes                | no            |
| 30.05.2010.  | around 11:00  | Poreč                   | 3                     | yes                                    | yes                | yes           |
| 01.06.2010.  | 09:00         | Rovinj – Pula           | 8                     | yes                                    | no                 | no            |
| 29.07.2010.  | 09:30         | Rovinj                  | 1                     | no                                     | no                 | no            |
| 26.09.2010.  | 11:03 – 11:08 | Rovinj                  | 1                     | no                                     | yes                | no            |
| 27.09.2010.  | 9:30 – 10:15  | Rovinj                  | 1                     | no                                     | yes                | no            |
| 27.09.2010.  | unknown       | Rovinj aquatorium       | 6                     | yes                                    | yes                | no            |
| 27.09.2010.  | around 12:00  | Poreč – Rovinj          | 3                     | yes                                    | yes                | no            |
| 22.05.2011.  | 15:00         | Medulin                 | 1                     | yes                                    | no                 | no            |
| 24.07.2011.  | around 11:00  | Prematura               | 1                     | no                                     | yes                | yes           |
| 24.07.2011.  | 17:55         | S of Kamenjak           | 1                     | no                                     | yes                | yes           |
| 24.07.2011.  | 18:00         | Medulin                 | 3                     | no                                     | yes                | yes           |
| 19.09.2011.  | 13:53         | Brseč                   | 1                     | yes                                    | yes                | yes           |
| 19.09.2011.  | 14:46-15:00   | Lovran                  | 1                     | no                                     | yes                | yes           |
| 17.12.2011.  | around 13:30  | Poreč                   | 1                     | no                                     | no                 | no            |
| 18.12.2011.  | 7:00          | Rovinj                  | 1                     | no                                     | no                 | no            |
| 13.09.2012.  | evening       | Rovinj                  | 1                     | no                                     | no                 | no            |
| 01.11.2012.  | night         | Istra                   | 1                     | no                                     | yes                | yes           |
| 01.12.2012.  | unknown       | Vodnjan                 | 1                     | no                                     | no                 | no            |
| 11.05.2013.  | all day       | Pula                    | 2                     | yes                                    | yes                | yes           |
| 30.05.2013.  | unknown       | Pula                    | 1                     | no                                     | yes                | no            |
| 24.06.2013.  | 14:00         | Pula                    | 2                     | yes                                    | yes                | yes           |
| 26.08.2013.  | 11:25         | Umag                    | 1                     | no                                     | no                 | no            |
| 28.08.2013.  | unknown       | Istra                   | 7                     | yes                                    | yes                | yes           |
| 28.08.2013.  | unknown       | Rovinj                  | 1                     | no                                     | yes                | yes           |
| 28.08.2013.  | unknown       | Lovrečica,Umag          | 3                     | no                                     | yes                | yes           |
| 11.09.2013.  | 16:30         | Rovinj                  | 3                     | yes                                    | yes                | yes           |
| 13.09.2013.  | morning       | Pula                    | 1                     | no                                     | no                 | no            |
| 14.09.2013.  | 07:00 - 08:30 | Pula                    | 4                     | yes                                    | no                 | no            |
| 17.12.2013.  | 13:30         | Učka                    | 1                     | no                                     | no                 | no            |
| 23.03.2014.  | afternoon     | west coast              | 1                     | yes                                    | yes                | yes           |
| 29.04.2014.  | 07:40         | Medulin, Kamenjak       | 1                     | yes                                    | no                 | no            |
| 30.06.2014.  | unknown       | Novigrad                | 1                     | yes                                    | yes                | yes           |
| 15.08.2014.  | 08:30         | Vrsar                   | 1                     | no                                     | no                 | no            |
| 07.10.2014.  | unknown       | Poreč, Vrsar            | 2                     | no                                     | no                 | no            |
| 22.10.2014.  | 04:35         | Špinovci                | 1                     | no                                     | yes                | no            |
| 16.08.2015.  | 15:50         | Savudria                | 1                     | no                                     | yes                | no            |
| 16.08.2015.  | 12:40         | Savudrijska vala        | 1                     | no                                     | yes                | no            |
| 16.08.2015.  | 13:00         | Brijuni                 | 1                     | yes                                    | yes                | yes           |
| 16.08.2015.  | unknown       | Lovrečica,Umag          | 1                     | yes                                    | yes                | no            |
| 05.09.2015.  | 09:00         | Pula                    | 2                     | yes                                    | yes                | yes           |
| 04.06.2016.  | 07:35         | SW of Pula              | 1                     | yes                                    | yes                | yes           |
| 17.09.2016.  | before noon   | Kamenjak                | 2                     | no                                     | yes                | yes           |
| 18.09.2016.  | 09:17         | Savudrija               | 5                     | yes                                    | yes                | no            |
| 09.09.2017.  | 09:30         | west coast              | 1                     | no                                     | yes                | yes           |
| 24.09. 2017. | morning       | Medulin                 | 4                     | yes                                    | yes                | yes           |
| 24.09. 2017. | unknown       | Kamenjak                | 1                     | no                                     | yes                | yes           |
| 17.05.2018.  | morning       | Medulin                 | 3                     | yes                                    | yes                | yes           |
| 04.09.2018.  | 07:00         | from Rovinj to Novigrad | 4                     | yes                                    | yes                | yes           |
